# Supplementary material for: Hellinger distance-based stable sparse feature selection for high-dimensional class-imbalanced data
Source: PubMed Central journal article supplement (PMC7092448; doi:10.1186/s12859-020-3411-3), 2020-03-23
Supplement: 12859_2020_3411_MOESM1_ESM.pdf [file 12859_2020_3411_MOESM1_ESM.pdf]

# **Supporting Information (SI)**

## **Hellinger distance-based stable sparse feature selection for high-dimensional class-imbalanced data**

Guang-Hui Fu<sup>1\*</sup>, Yuan-Jiao Wu<sup>1</sup>, Min-Jie Zong<sup>1</sup>, Jianxin Pan<sup>2</sup>

### **Authors affiliations:**

<sup>1</sup>School of Science, Kunming University of Science and Technology, Kunming, 650500,  
China

<sup>2</sup>School of Mathematics, The University of Manchester, Manchester, M13 9PL, UK

### **Correspondence information**

Corresponding author: Guang-Hui Fu.  
*E-mail address:* guanghuiFu@kust.edu.cn

The results on SRBCT dataset (SI-Fig. 1 to 2)

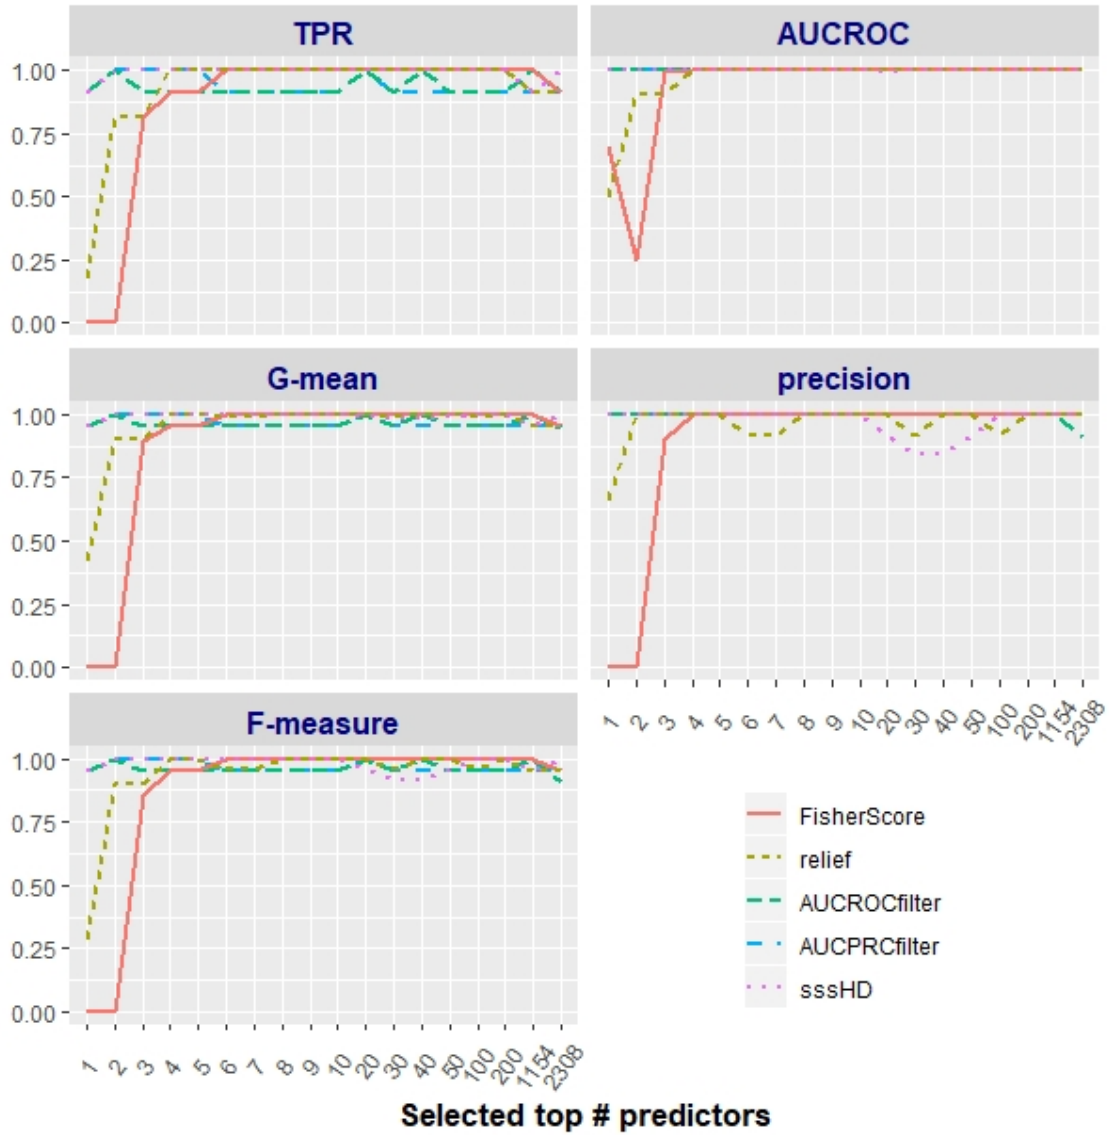

SI-Fig. 1 The performance of five methods on SRBCT with no resampling.

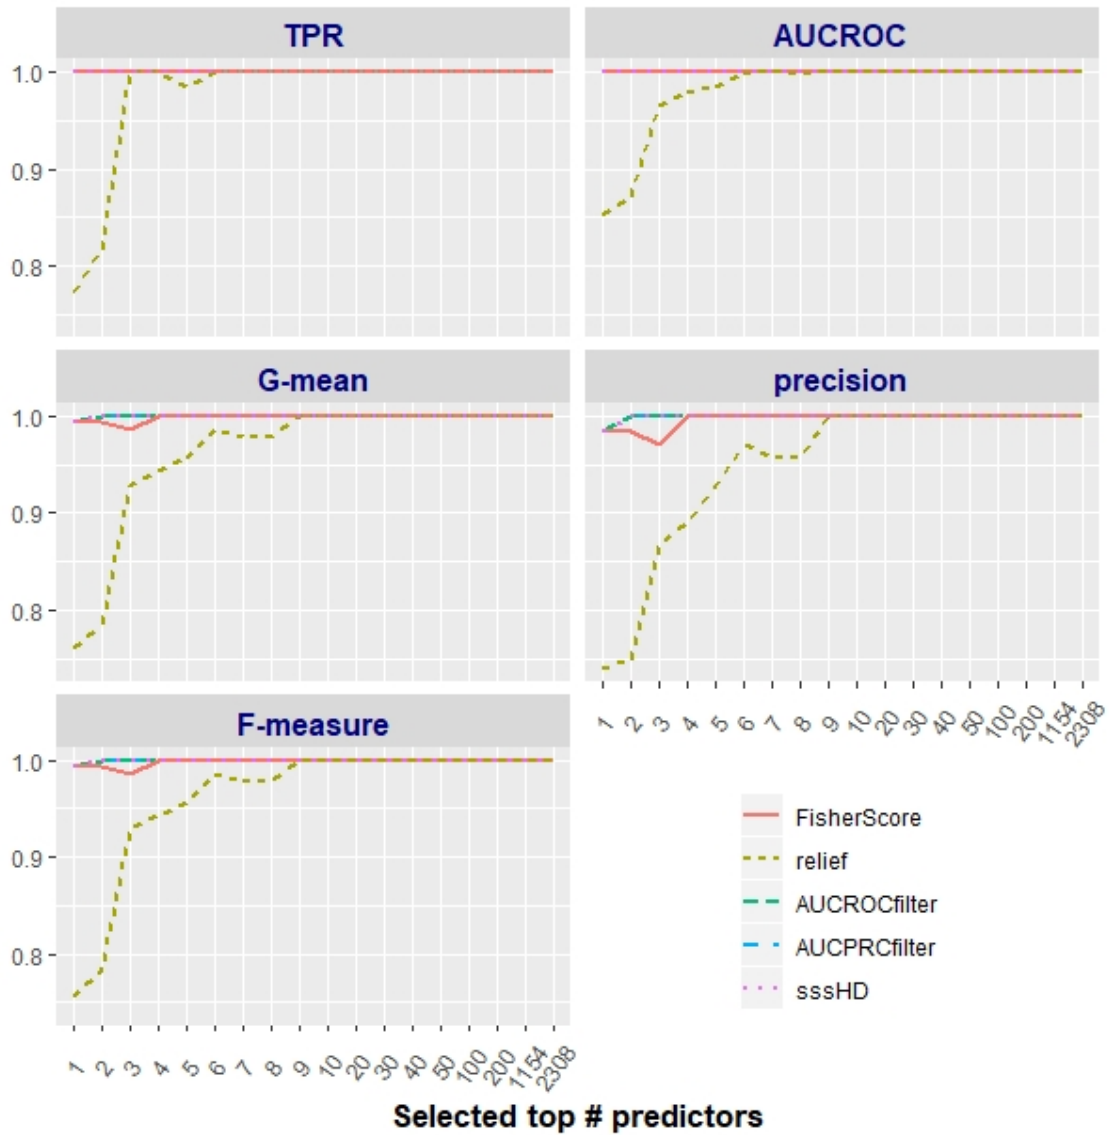

SI-Fig. 2 The performance of five methods on SRBCT with SMOTE over-resampling.

The results on CAR dataset (SI-Fig. 3 to 4)

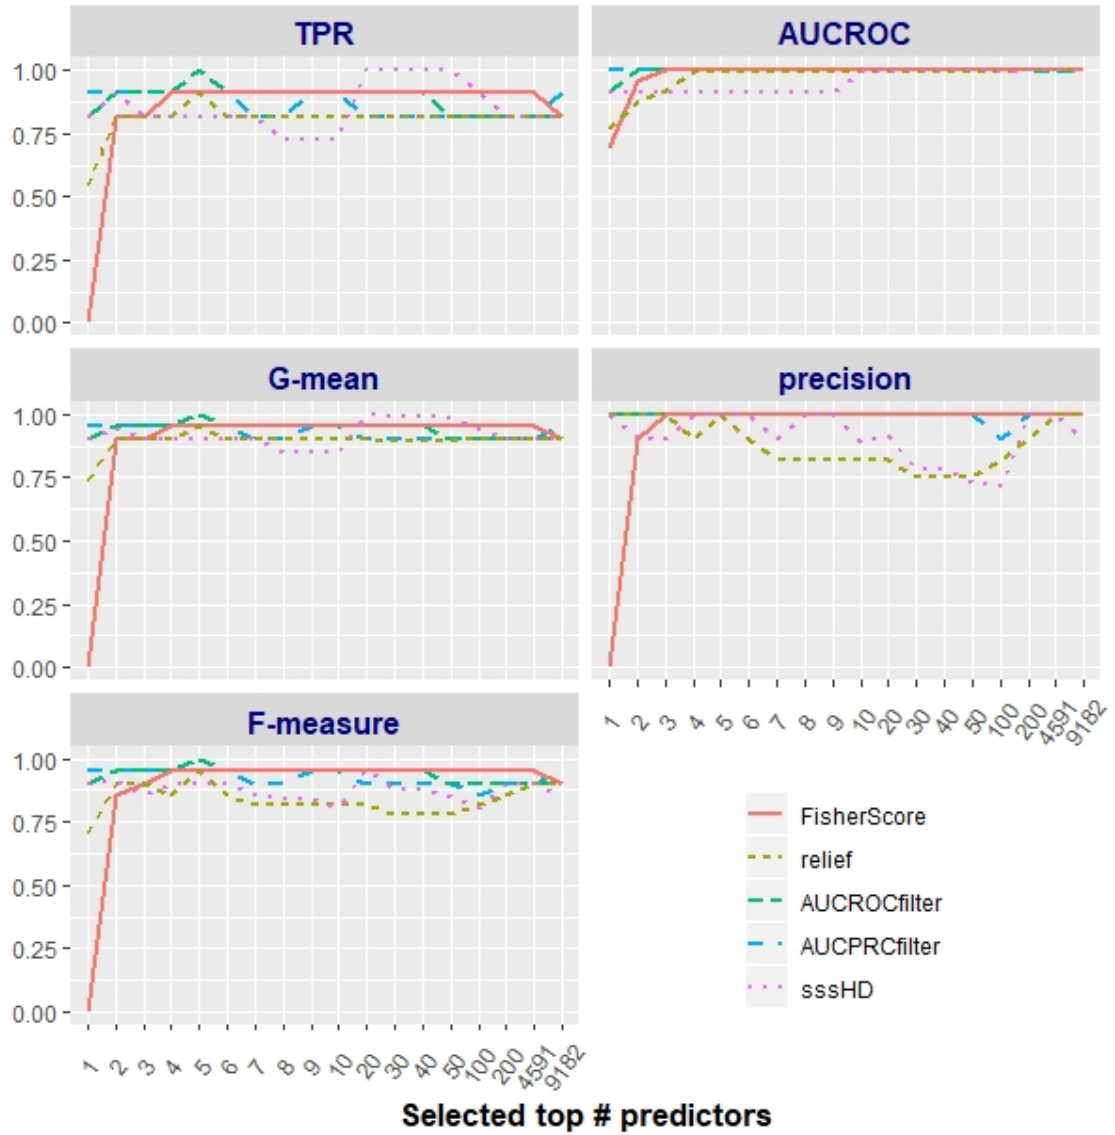

SI-Fig. 3 The performance of five methods on CAR with no resampling.

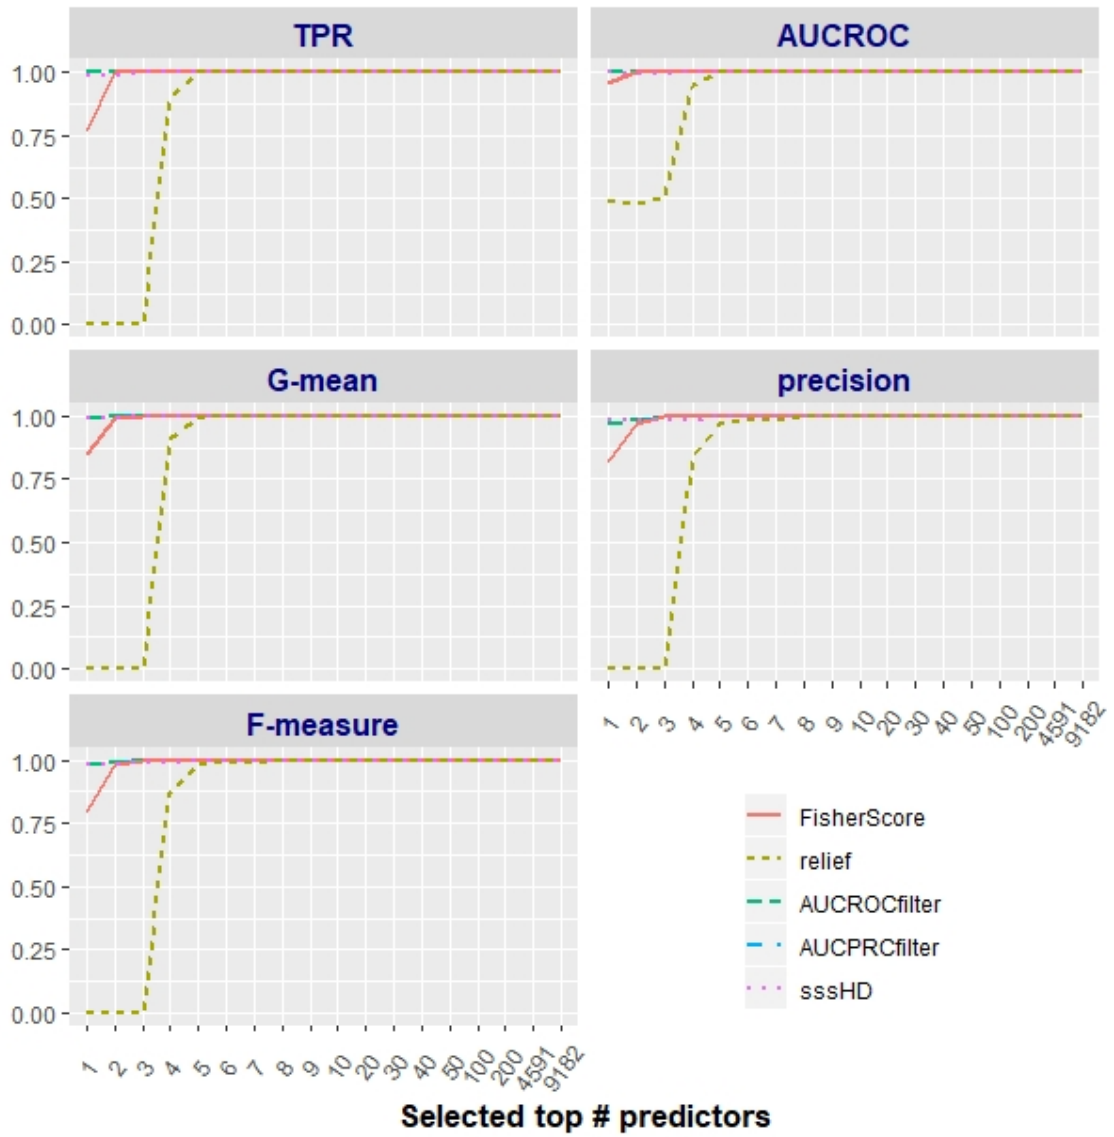

SI-Fig. 4 The performance of five methods on CAR with SMOTE over-resampling.

The results on GLIOMA dataset (SI-Fig. 5 to 6)

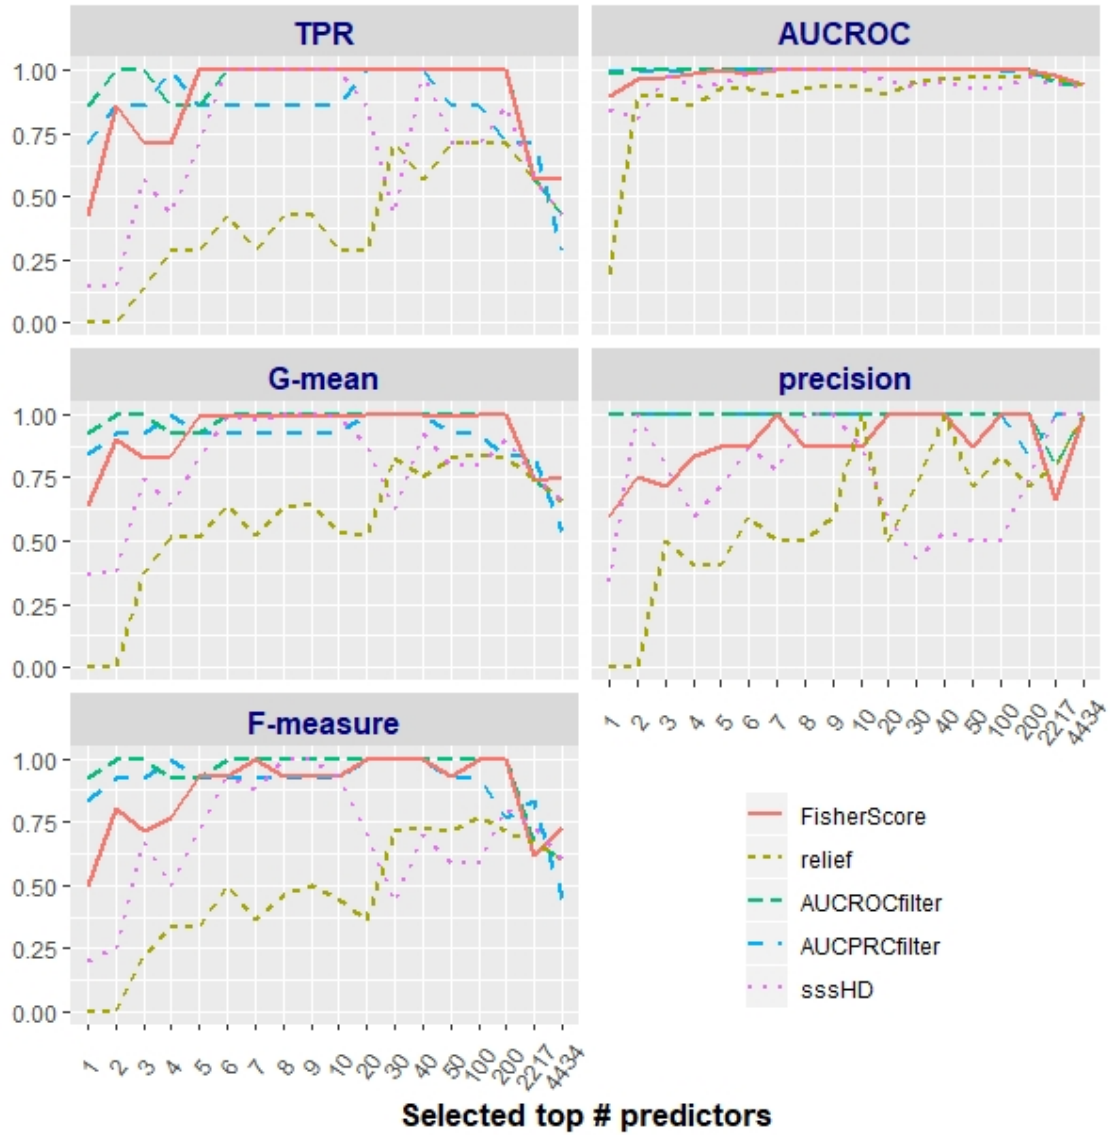

SI-Fig. 5 The performance of five methods on GLIOMA with no resampling.

The results on GLIOMA dataset (SI-Fig. 7)

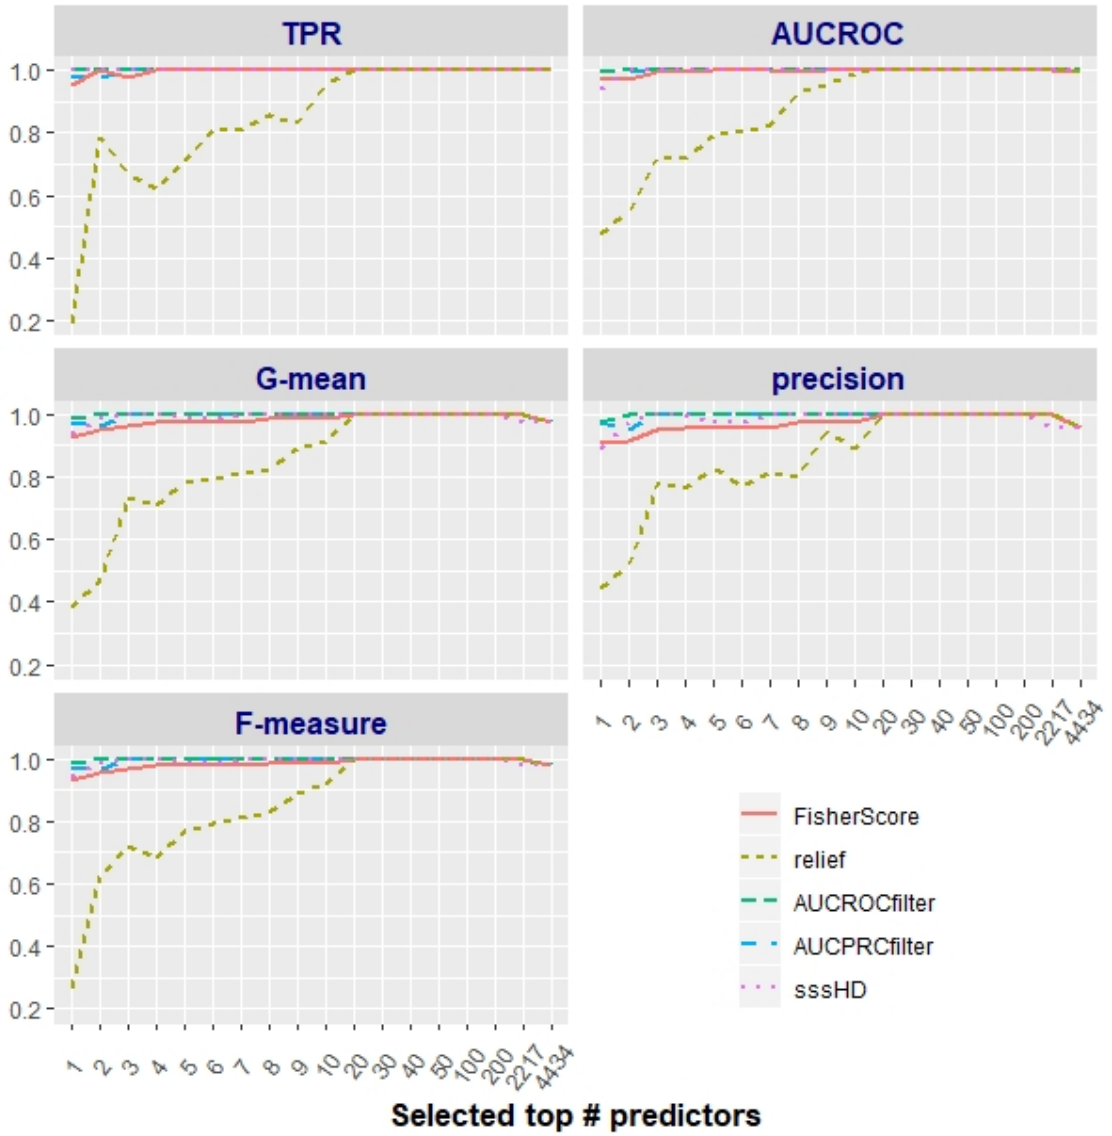

SI-Fig. 7 The performance of five methods on GLIOMA with SMOTE over-resampling.

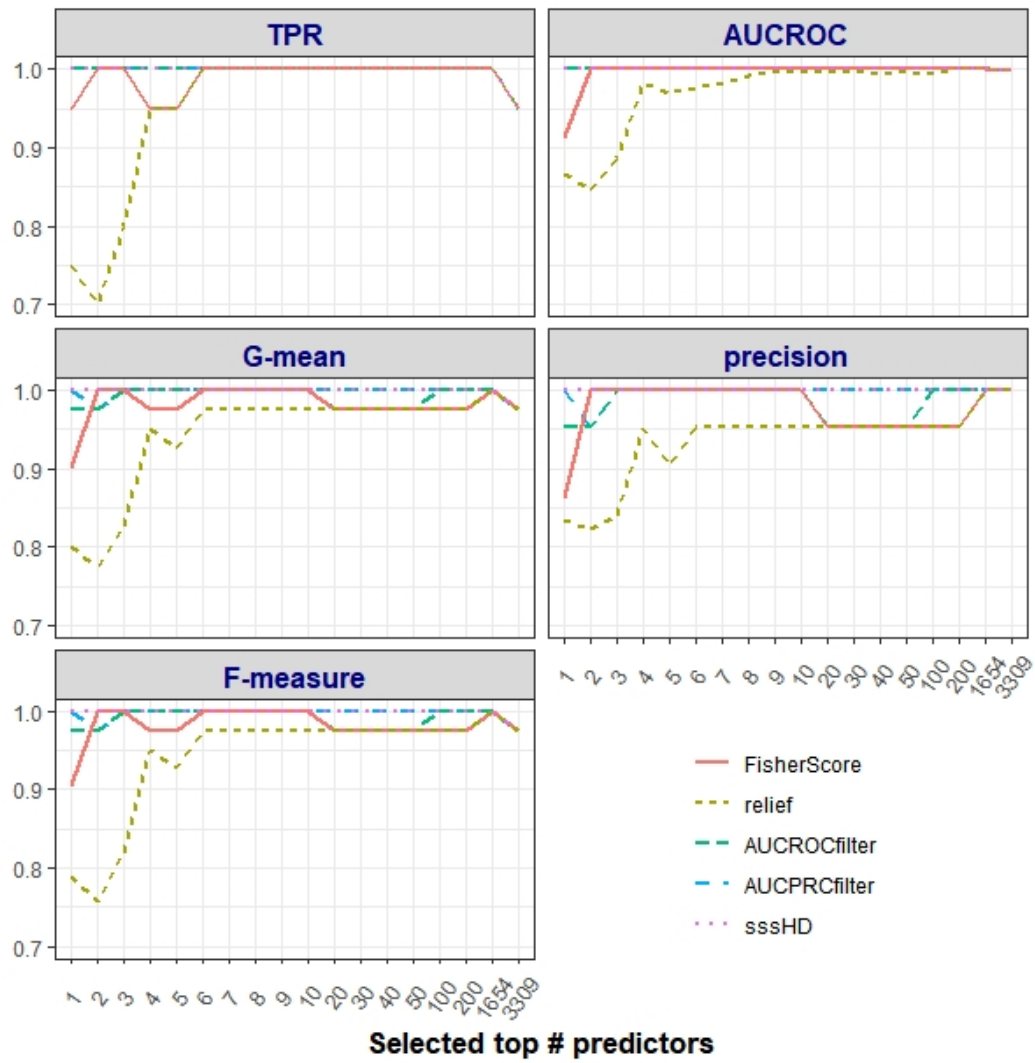

SI-Fig. 7 The performance of five methods on LUNG with no resampling.
